# Supplementary figures and images for: A bacterial filter protects and structures the gut microbiome of an insect
Source: PubMed Central journal article supplement — ISME J. 2016 Feb 12;10(8):1866–76. doi: 10.1038/ismej.2015.264 (PMC5029173; doi:10.1038/ismej.2015.264), 2016-02-12

Colony 1b ant 1

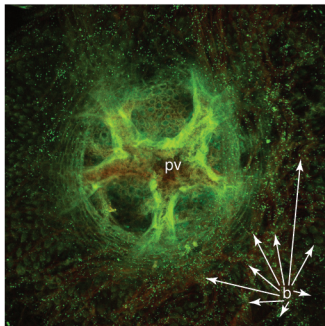

Colony 1b ant 2

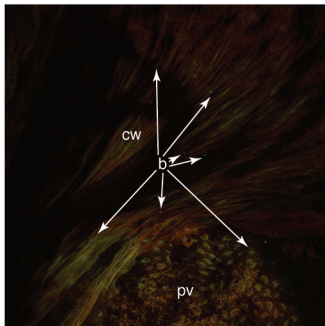

Colony 2b ant 6

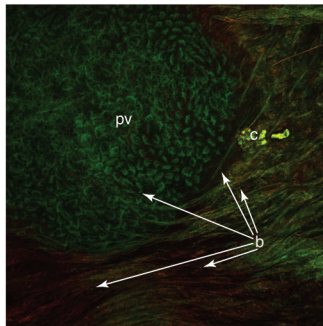

Colony 8b ant 5

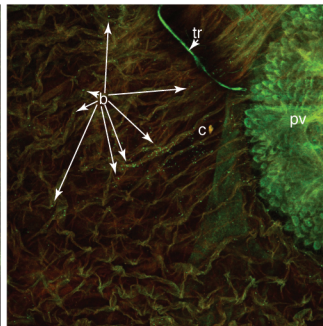

Crop

Midgut

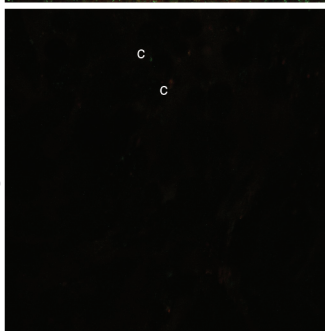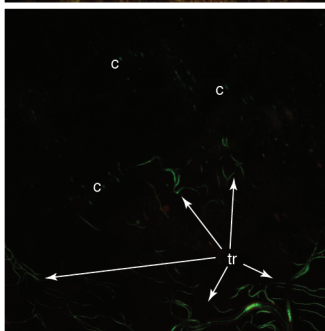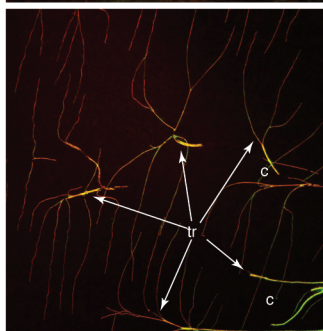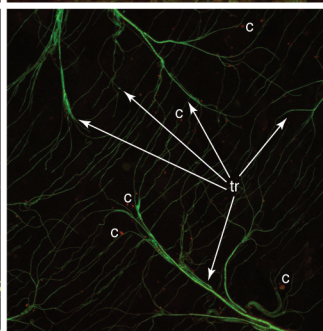

Ileum of hindgut

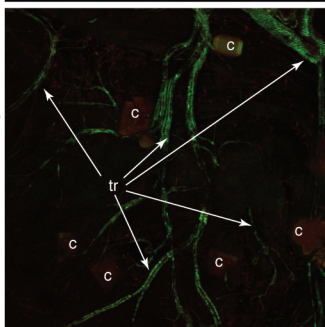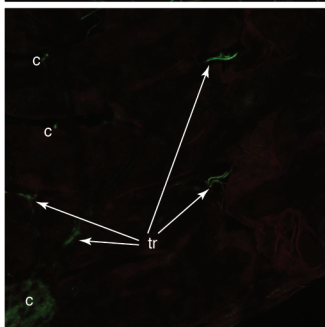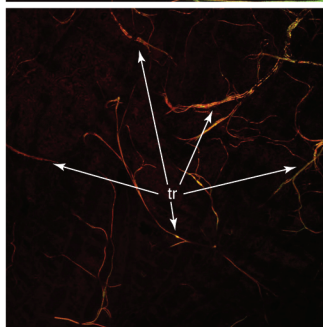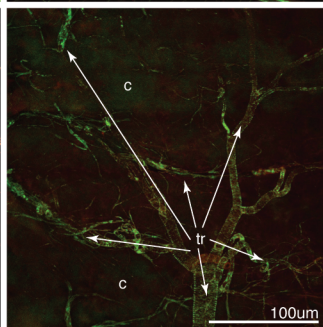

100um

Supplement: ismej2015264x10.pdf [file ismej2015264x10.pdf]

Colony 8b ant 5

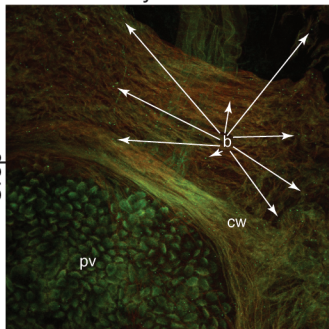

Colony 2b ant 3

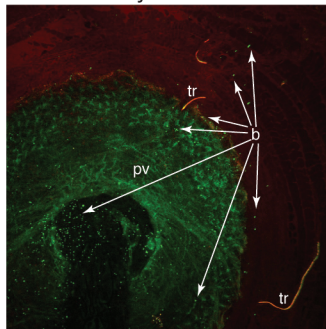

Colony 9b ant 3

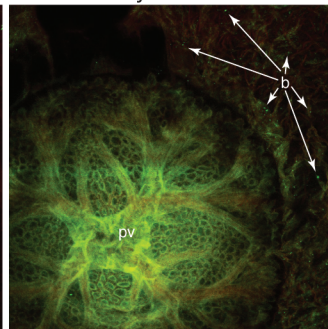

Colony 9b ant 1

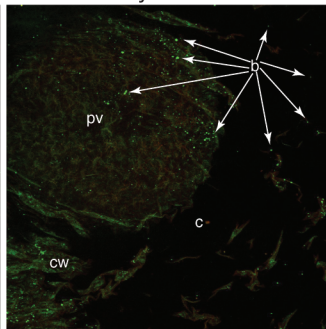

Crop

Midgut

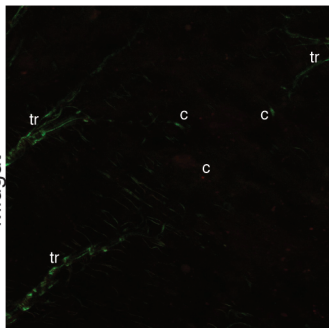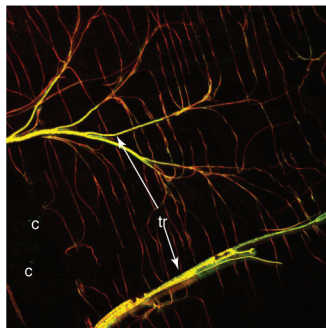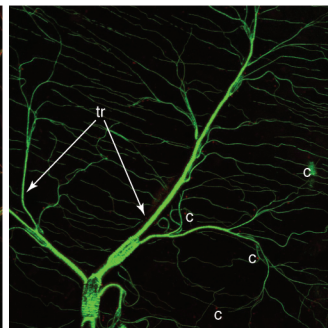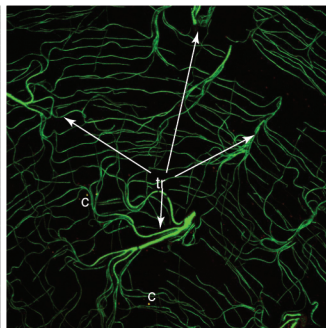

Ileum of hindgut

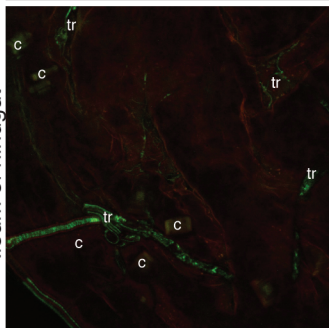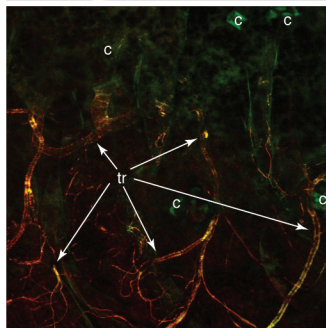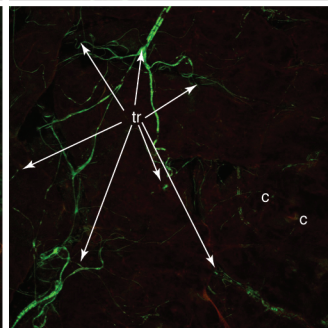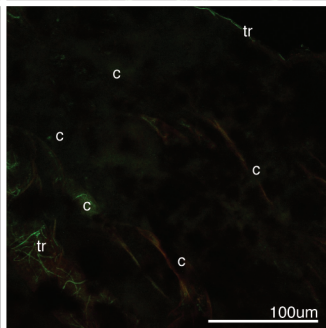

100um

Supplement: ismej2015264x11.pdf [file ismej2015264x11.pdf]

Colony 6b ant 3

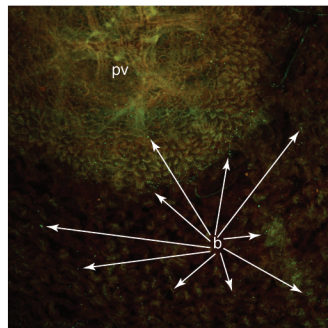

Colony 5b ant 1

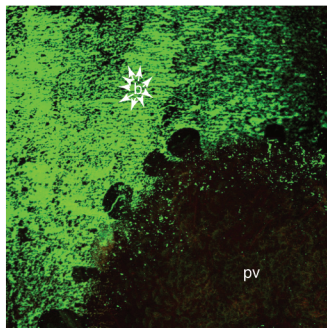

Colony 4b ant 3

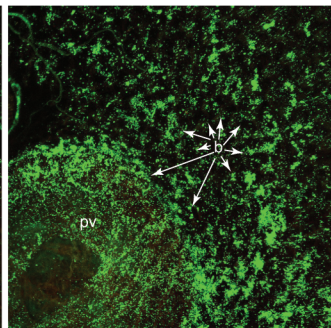

Colony 4b ant 2

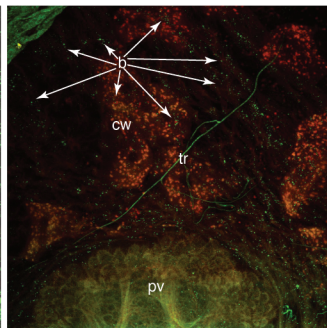

Crop

Midgut

Ileum of hindgut

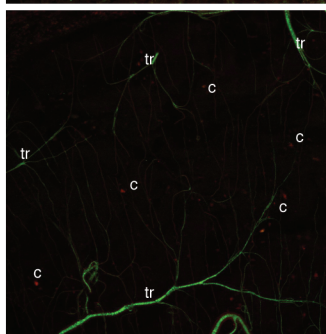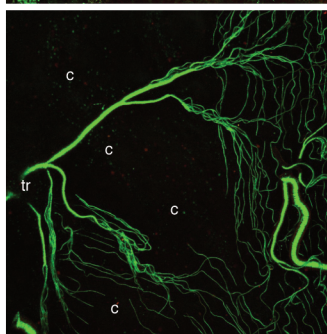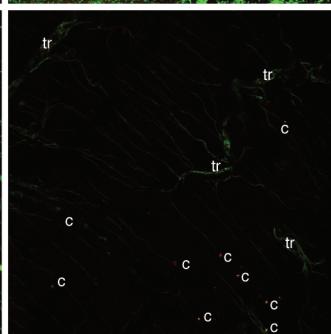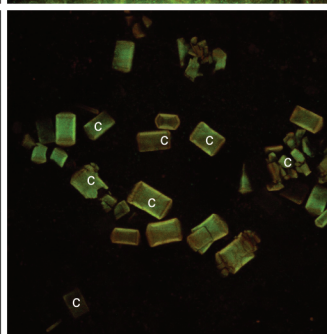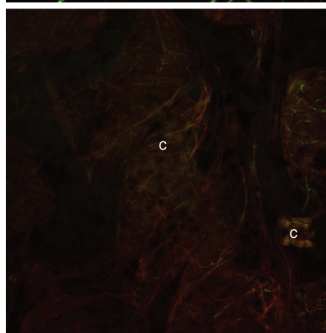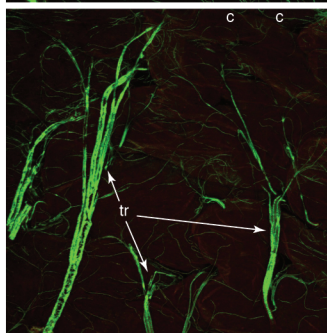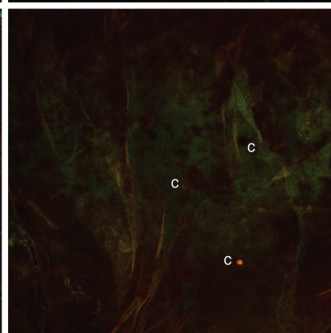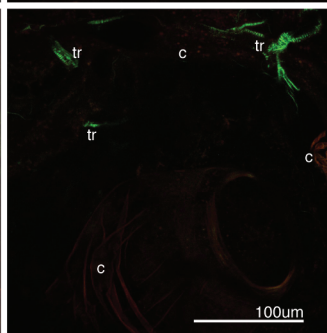

Supplement: ismej2015264x12.pdf [file ismej2015264x12.pdf]

Colony 5b ant 2

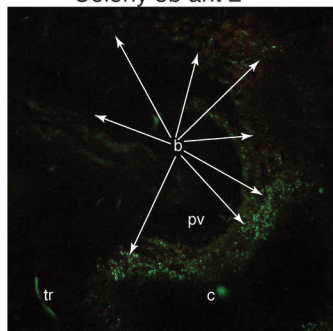

Colony 1b male1

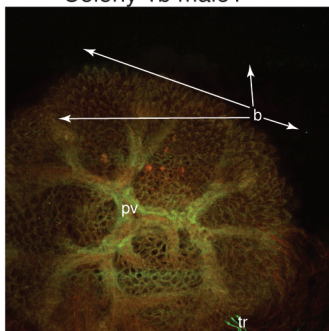

Colony 2b ant 1

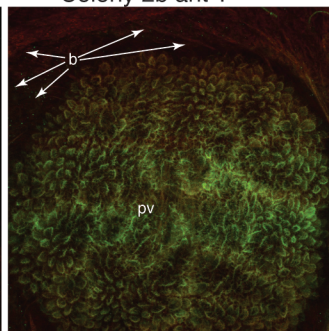

Colony 1b callow 1

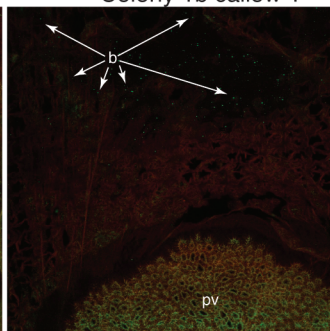

Crop

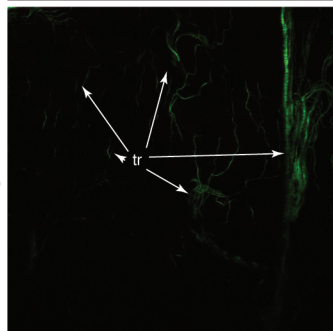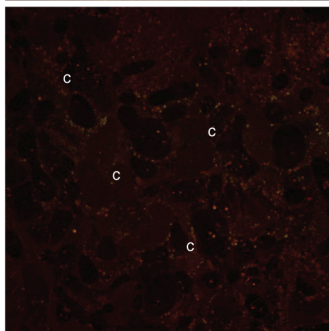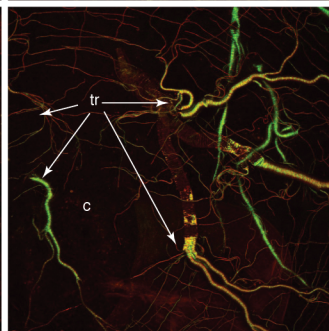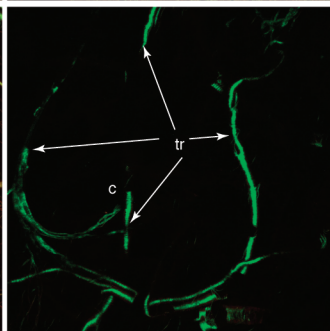

Midgut

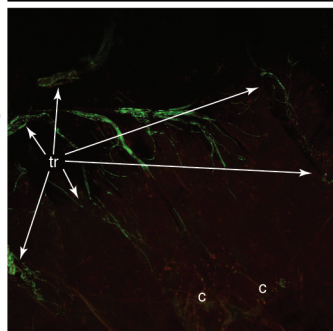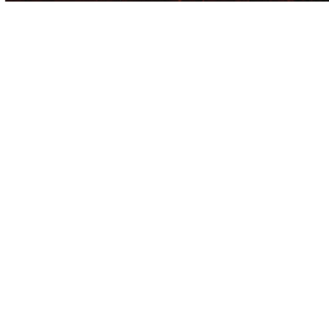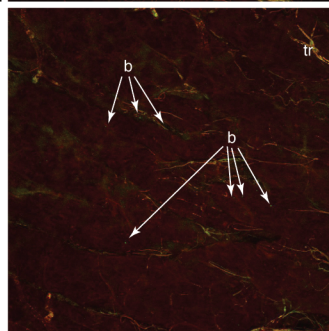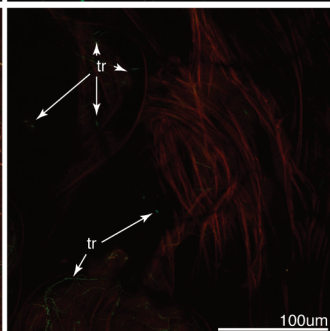

Ileum of hindgut

Supplement: ismej2015264x13.pdf [file ismej2015264x13.pdf]

Colony 5b callow 1

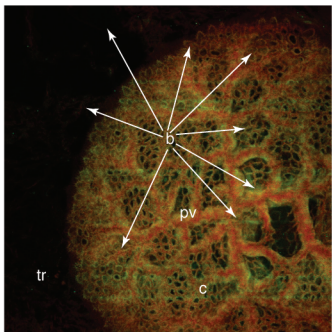

Colony 6b callow 1

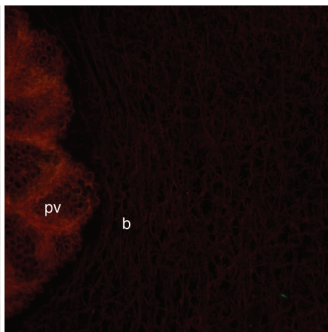

Colony 6b callow 2

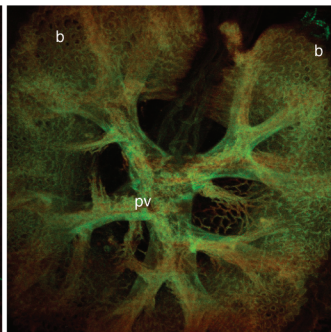

Colony 8b callow 1

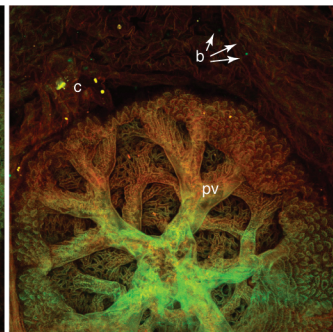

Crop

Midgut

Ileum of hindgut

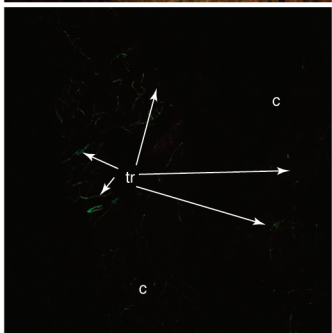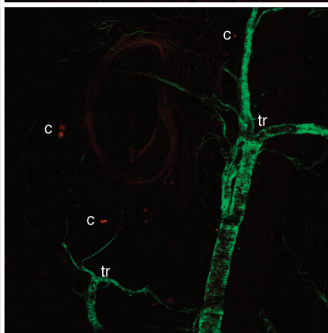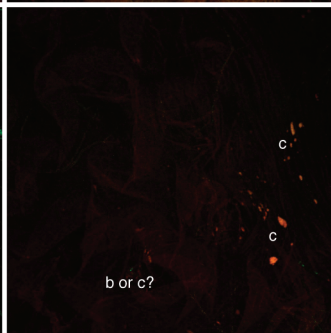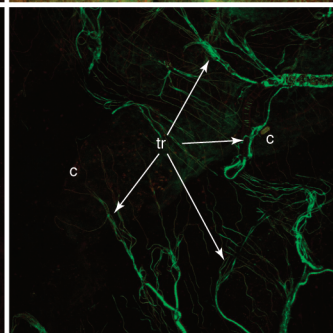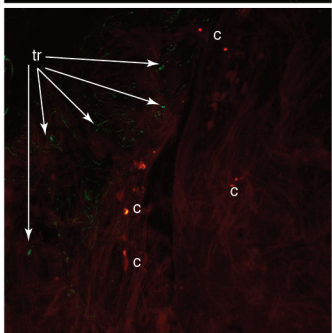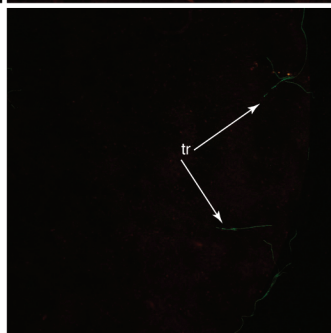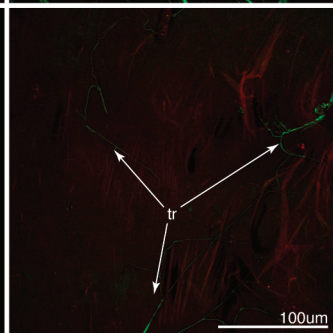

Supplement: ismej2015264x14.pdf [file ismej2015264x14.pdf]

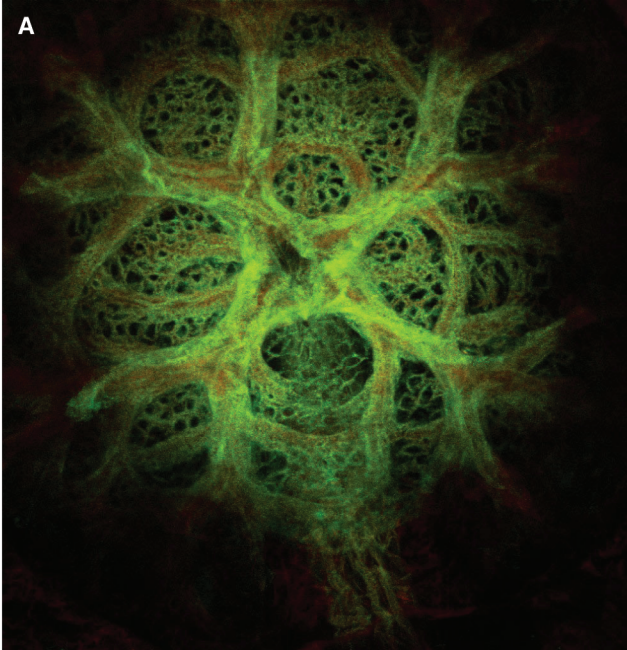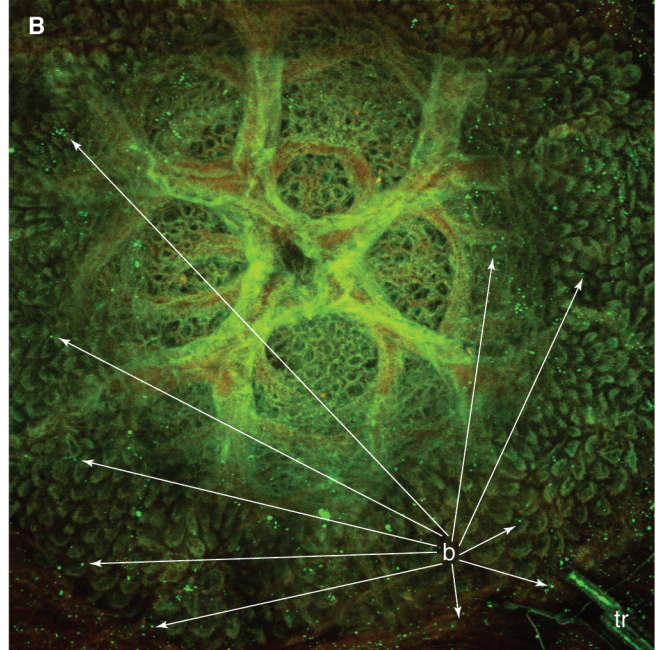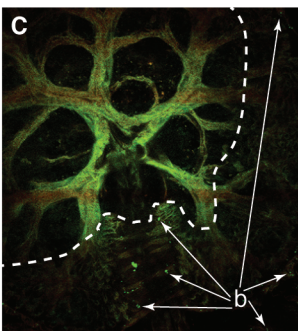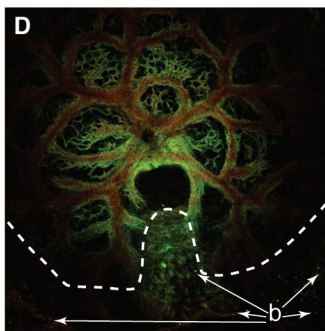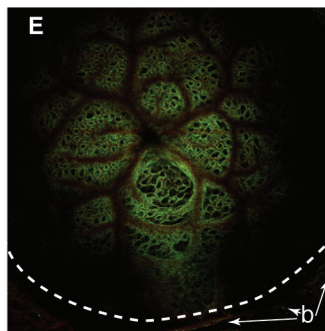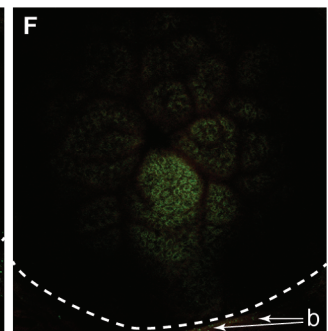

Supplement: ismej2015264x15.pdf [file ismej2015264x15.pdf]

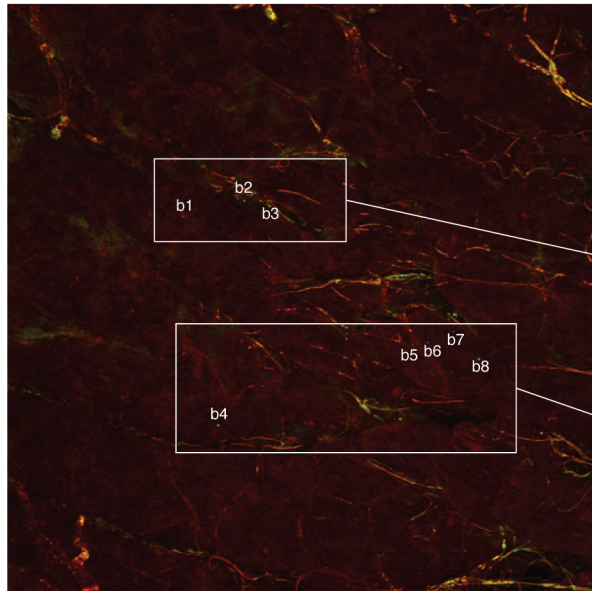

A

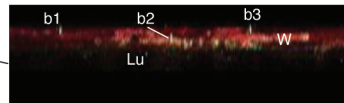

B

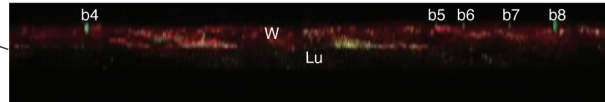

Supplement: ismej2015264x16.pdf [file ismej2015264x16.pdf]

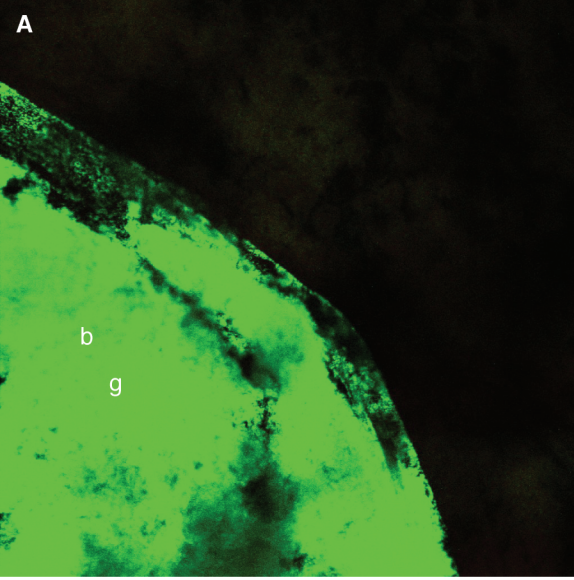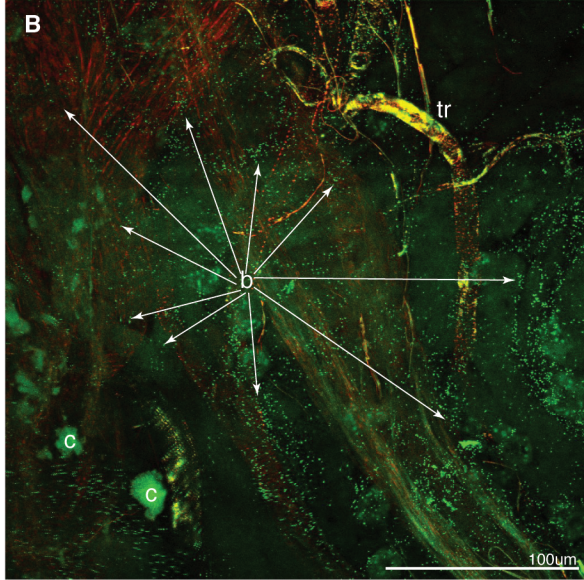

Supplement: ismej2015264x17.pdf [file ismej2015264x17.pdf]
